# Supplementary material
Source: PubMed Central journal article supplement (PMC2810358)
Supplement: NIHMS160709-supplement-1_si_001.pdf [file NIHMS160709-supplement-1_si_001.pdf]

**Supplementary Table 1: List of all significantly differentially expressed proteins**

| Gene symbol and protein name                                           | Accession number | Normalized spectral counts |     |                           |     | Fold change | P-value |
|------------------------------------------------------------------------|------------------|----------------------------|-----|---------------------------|-----|-------------|---------|
|                                                                        |                  | Arachnoidal cells in duplo |     | Meningioma cells in duplo |     |             |         |
| PRKDC Isoform 1 of DNA-dependent protein kinase catalytic subunit      | IPI00296337      | 53                         | 54  | 192                       | 184 | 3,511       | 0,00002 |
| FER1L3 Isoform 1 of Myoferlin                                          | IPI00021048      | 159                        | 160 | 46                        | 44  | -3,573      | 0,00002 |
| MX1 Interferon-induced GTP-binding protein Mx1                         | IPI00167949      | 0                          | 0   | 52                        | 55  | 100,000     | 0,00005 |
| KIAA1618 Isoform 1 of Protein ALO17                                    | IPI00642126      | 1                          | 0   | 50                        | 49  | 101,119     | 0,00007 |
| LMO7 Isoform 3 of LIM domain only protein 7                            | IPI00291802      | 62                         | 66  | 8                         | 12  | -6,275      | 0,00008 |
| SPTBN1 Isoform Long of Spectrin beta chain, brain 1                    | IPI00005614      | 224                        | 216 | 119                       | 116 | -1,871      | 0,00011 |
| TLN1 Talin-1                                                           | IPI00784273      | 237                        | 219 | 120                       | 115 | -1,937      | 0,00012 |
| SPTAN1 Isoform 1 of Spectrin alpha chain, brain                        | IPI00844215      | 239                        | 230 | 136                       | 136 | -1,727      | 0,00016 |
| MCM2 DNA replication licensing factor MCM2                             | IPI00184330      | 0                          | 0   | 23                        | 22  | 100,000     | 0,00017 |
| KRT7 Keratin, type II cytoskeletal 7                                   | IPI00306959      | 37                         | 29  | 2                         | 1   | -21,379     | 0,00018 |
| FN1 fibronectin 1 isoform 4 preproprotein                              | IPI00414283      | 94                         | 82  | 30                        | 29  | -2,942      | 0,00018 |
| MCM3 DNA replication licensing factor MCM3                             | IPI00013214      | 0                          | 0   | 21                        | 20  | 100,000     | 0,00019 |
| GLS Isoform KGA of Glutaminase kidney isoform, mitochondrial precursor | IPI00289159      | 17                         | 18  | 0                         | 0   | -100,000    | 0,00025 |
| MCM7 Isoform 1 of DNA replication licensing factor MCM7                | IPI00299904      | 0                          | 0   | 21                        | 17  | 100,000     | 0,00026 |
| MYH10 Isoform 1 of Myosin-10                                           | IPI00397526      | 10                         | 12  | 43                        | 45  | 4,075       | 0,00026 |
| MCM4 DNA replication licensing factor MCM4                             | IPI00018349      | 0                          | 0   | 19                        | 16  | 100,000     | 0,00027 |
| COL12A1 Isoform 1 of Collagen alpha-1(XII) chain precursor             | IPI00329573      | 10                         | 11  | 44                        | 56  | 4,864       | 0,00027 |
| RANBP2 E3 SUMO-protein ligase RanBP2                                   | IPI00221325      | 1                          | 1   | 35                        | 24  | 30,677      | 0,00030 |
| CSE1L Isoform 1 of Exportin-2                                          | IPI00022744      | 7                          | 4   | 32                        | 32  | 6,038       | 0,00035 |
| SAMHD1 SAM domain and HD domain-containing protein 1                   | IPI00294739      | 0                          | 0   | 14                        | 15  | 100,000     | 0,00035 |
| SLC4A7 137 kDa protein                                                 | IPI00328342      | 21                         | 19  | 1                         | 0   | -39,209     | 0,00036 |
| MCM5 DNA replication licensing factor MCM5                             | IPI00018350      | 0                          | 0   | 16                        | 13  | 100,000     | 0,00037 |
| GMPS GMP synthase                                                      | IPI00029079      | 1                          | 2   | 20                        | 18  | 13,024      | 0,00042 |
| LMNB1 Lamin-B1                                                         | IPI00217975      | 0                          | 1   | 19                        | 17  | 37,002      | 0,00045 |
| UBR4 Isoform 3 of Zinc finger UBR1-type protein 1                      | IPI00646605      | 17                         | 19  | 50                        | 58  | 2,990       | 0,00046 |
| RECQL ATP-dependent DNA helicase Q1                                    | IPI00178431      | 0                          | 0   | 11                        | 14  | 100,000     | 0,00047 |
| SDCBP Syntenin isoform 3                                               | IPI00479018      | 12                         | 11  | 0                         | 0   | -100,000    | 0,00050 |
| NEK7 Serine/threonine-protein kinase Nek7                              | IPI00152658      | 12                         | 11  | 0                         | 0   | -100,000    | 0,00050 |
| IFITM3 Interferon-induced transmembrane protein 3                      | IPI00303726      | 5                          | 6   | 37                        | 27  | 5,959       | 0,00051 |
| MCM6 DNA replication licensing factor MCM6                             | IPI00031517      | 1                          | 0   | 17                        | 16  | 33,706      | 0,00052 |
| OAS3 2'-5'-oligoadenylate synthetase 3                                 | IPI00002405      | 0                          | 0   | 10                        | 11  | 100,000     | 0,00054 |
| VARS Valyl-tRNA synthetase                                             | IPI00000873      | 33                         | 35  | 7                         | 10  | -3,913      | 0,00054 |
| SYNE2 Isoform 1 of Nesprin-2                                           | IPI00239405      | 0                          | 0   | 20                        | 13  | 100,000     | 0,00055 |
| EPPK1 Epiplakin                                                        | IPI00010951      | 0                          | 0   | 16                        | 11  | 100,000     | 0,00056 |
| CDC2 Hypothetical protein DKFZp686L20222                               | IPI00026689      | 0                          | 0   | 10                        | 10  | 100,000     | 0,00058 |
| MAP1A 331 kDa protein                                                  | IPI00020356      | 57                         | 61  | 20                        | 25  | -2,612      | 0,00059 |
| UTRN Utrophin                                                          | IPI00009329      | 15                         | 15  | 43                        | 55  | 3,334       | 0,00060 |
| GALNT1 Isoform 1 of Polypeptide N-acetylgalactosaminyltransferase 1    | IPI00025818      | 10                         | 13  | 0                         | 0   | -100,000    | 0,00060 |
| MAP1B Microtubule-associated protein 1B                                | IPI00008868      | 145                        | 134 | 77                        | 84  | -1,734      | 0,00062 |
| HMGB2 High mobility group protein B2                                   | IPI00219097      | 0                          | 0   | 9                         | 10  | 100,000     | 0,00064 |
| XRCC6 70 kDa protein                                                   | IPI00465430      | 11                         | 15  | 41                        | 39  | 3,166       | 0,00067 |
| VCL Isoform 1 of Vinculin                                              | IPI00291175      | 131                        | 130 | 78                        | 79  | -1,661      | 0,00069 |
| ITGA2 Integrin alpha-2 precursor                                       | IPI00013744      | 10                         | 9   | 0                         | 0   | -100,000    | 0,00070 |
| RPA1 Replication protein A 70 kDa DNA-binding subunit                  | IPI00020127      | 0                          | 0   | 10                        | 16  | 100,000     | 0,00074 |
| ANXA1 Annexin A1                                                       | IPI00218918      | 98                         | 101 | 48                        | 57  | -1,898      | 0,00074 |
| ANPEP Aminopeptidase N                                                 | IPI00221224      | 14                         | 14  | 0                         | 1   | -26,955     | 0,00074 |
| AARS Alanyl-tRNA synthetase, cytoplasmic                               | IPI00027442      | 15                         | 14  | 40                        | 39  | 2,801       | 0,00076 |
| CLDN11 Claudin-11                                                      | IPI00026053      | 0                          | 0   | 9                         | 8   | 100,000     | 0,00080 |
| SERPINE1 Plasminogen activator inhibitor 1 precursor                   | IPI00007118      | 10                         | 8   | 0                         | 0   | -100,000    | 0,00084 |
| PARP1 Poly [ADP-ribose] polymerase 1                                   | IPI00449049      | 0                          | 1   | 15                        | 12  | 27,508      | 0,00089 |

|                                                                                                                    |             |     |     |     |     |          |         |
|--------------------------------------------------------------------------------------------------------------------|-------------|-----|-----|-----|-----|----------|---------|
| ICAM1 Intercellular adhesion molecule 1 precursor                                                                  | IPI00008494 | 1   | 1   | 13  | 12  | 12,660   | 0,00089 |
| AKAP12 Isoform 1 of A-kinase anchor protein 12                                                                     | IPI00237884 | 66  | 72  | 29  | 35  | -2,140   | 0,00090 |
| APOB Apolipoprotein B-100 precursor                                                                                | IPI00022229 | 14  | 17  | 2   | 1   | -9,743   | 0,00094 |
| CNN1 Calponin-1                                                                                                    | IPI00021264 | 1   | 4   | 20  | 24  | 9,066    | 0,00096 |
| SRRM2 Isoform 1 of Serine/arginine repetitive matrix protein 2                                                     | IPI00782992 | 0   | 0   | 13  | 8   | 100,000  | 0,00096 |
| NASP Isoform 1 of Nuclear autoantigenic sperm protein                                                              | IPI00179953 | 0   | 0   | 7   | 8   | 100,000  | 0,00097 |
| LRPPRC Leucine-rich PPR motif-containing protein                                                                   | IPI00783271 | 56  | 58  | 26  | 27  | -2,134   | 0,00100 |
| AKR1C3 Aldo-keto reductase family 1 member C3                                                                      | IPI00291483 | 7   | 8   | 0   | 0   | -100,000 | 0,00106 |
| NUP93 Nuclear pore complex protein Nup93                                                                           | IPI00397904 | 0   | 1   | 13  | 11  | 24,321   | 0,00107 |
| SMC4 Isoform 1 of Structural maintenance of chromosomes protein 4                                                  | IPI00411559 | 0   | 0   | 7   | 7   | 100,000  | 0,00107 |
| ATP5B ATP synthase subunit beta, mitochondrial precursor                                                           | IPI00303476 | 77  | 82  | 45  | 39  | -1,883   | 0,00110 |
| HSPB6 Heat-shock protein beta-6                                                                                    | IPI00022433 | 10  | 7   | 0   | 0   | -100,000 | 0,00110 |
| CRYAB Alpha-crystallin B chain                                                                                     | IPI00021369 | 11  | 15  | 1   | 1   | -12,319  | 0,00117 |
| PHGDH D-3-phosphoglycerate dehydrogenase                                                                           | IPI00011200 | 3   | 3   | 24  | 16  | 6,877    | 0,00119 |
| HYOU1 Hypoxia up-regulated protein 1 precursor                                                                     | IPI00000877 | 53  | 53  | 26  | 24  | -2,108   | 0,00121 |
| MCAM Isoform 1 of Cell surface glycoprotein MUC18 precursor                                                        | IPI00016334 | 0   | 0   | 6   | 8   | 100,000  | 0,00122 |
| FEN1 Flap endonuclease 1                                                                                           | IPI00026215 | 0   | 0   | 6   | 8   | 100,000  | 0,00122 |
| RRM1 Ribonucleoside-diphosphate reductase large subunit                                                            | IPI00013871 | 0   | 0   | 6   | 9   | 100,000  | 0,00127 |
| FXR1 Isoform 1 of Fragile X mental retardation syndrome-related protein 1                                          | IPI00016249 | 0   | 0   | 7   | 6   | 100,000  | 0,00130 |
| PPIB peptidylprolyl isomerase B precursor                                                                          | IPI00646304 | 52  | 64  | 25  | 25  | -2,302   | 0,00130 |
| KCTD12 BTB/POZ domain-containing protein KCTD12                                                                    | IPI00060715 | 8   | 6   | 0   | 0   | -100,000 | 0,00136 |
| ANXA2 annexin A2 isoform 1                                                                                         | IPI00418169 | 164 | 133 | 57  | 75  | -2,246   | 0,00141 |
| TPR Nucleoprotein TPR                                                                                              | IPI00022970 | 9   | 7   | 25  | 34  | 3,814    | 0,00141 |
| CRABP2 Cellular retinoic acid-binding protein 2                                                                    | IPI00216088 | 0   | 0   | 6   | 6   | 100,000  | 0,00142 |
| AADACL1 arylacetamide deacetylase-like 1                                                                           | IPI00002230 | 12  | 15  | 2   | 1   | -8,486   | 0,00144 |
| ATP6V0A1 Isoform 1 of Vacuolar proton translocating ATPase 116 kDa subunit a isoform 1                             | IPI00465178 | 6   | 6   | 0   | 0   | -100,000 | 0,00155 |
| PCK2 Phosphoenolpyruvate carboxykinase [GTP], mitochondrial precursor                                              | IPI00294380 | 2   | 2   | 14  | 12  | 6,598    | 0,00156 |
| HUWE1 Isoform 2 of E3 ubiquitin-protein ligase HUWE1                                                               | IPI00445401 | 24  | 28  | 57  | 52  | 2,072    | 0,00156 |
| STMN1 Stathmin                                                                                                     | IPI00479997 | 5   | 4   | 20  | 17  | 4,223    | 0,00157 |
| DDX17 DEAD box polypeptide 17 isoform 1                                                                            | IPI00023785 | 0   | 1   | 10  | 9   | 20,094   | 0,00163 |
| MICA;HLA-A;HLA-A29.1;LOC730410;HLA-B;HLA-C HLA class I histocompatibility antigen, B-50 alpha chain precursor      | IPI00471955 | 3   | 3   | 24  | 15  | 6,703    | 0,00164 |
| MICA;HLA-A;HLA-A29.1;LOC730410;HLA-B;HLA-C HLA class I histocompatibility antigen, A-1 alpha chain precursor       | IPI00026569 | 2   | 5   | 18  | 18  | 5,276    | 0,00164 |
| RIF1 Isoform 1 of Telomere-associated protein RIF1                                                                 | IPI00477805 | 0   | 0   | 5   | 7   | 100,000  | 0,00166 |
| DYNC1H1 Dynein heavy chain, cytosolic                                                                              | IPI00456969 | 318 | 310 | 397 | 390 | 1,251    | 0,00168 |
| TUBB3 Tubulin beta-3 chain                                                                                         | IPI00013683 | 27  | 22  | 8   | 5   | -3,706   | 0,00169 |
| ITGA5 Integrin alpha-5 precursor                                                                                   | IPI00306604 | 26  | 26  | 9   | 9   | -2,844   | 0,00172 |
| SMARCC2 Isoform 2 of SWI/SNF-related matrix-associated actin-dependent regulator of chromatin subfamily C member 2 | IPI00150057 | 0   | 0   | 5   | 6   | 100,000  | 0,00173 |
| GOLGB1 Golgin subfamily B member 1                                                                                 | IPI00004671 | 11  | 14  | 30  | 35  | 2,697    | 0,00174 |
| QPRT Nicotinate-nucleotide pyrophosphorylase                                                                       | IPI00300086 | 7   | 5   | 0   | 0   | -100,000 | 0,00186 |
| TMPO Lamina-associated polypeptide 2 isoform alpha                                                                 | IPI00216230 | 0   | 0   | 8   | 5   | 100,000  | 0,00189 |
| TM9SF2 Transmembrane 9 superfamily protein member 2 precursor                                                      | IPI00018415 | 5   | 6   | 0   | 0   | -100,000 | 0,00192 |
| TCEA1 Isoform 1 of Transcription elongation factor A protein 1                                                     | IPI00333215 | 0   | 0   | 5   | 9   | 100,000  | 0,00192 |
| EFTUD2 116 kDa U5 small nuclear ribonucleoprotein component                                                        | IPI00003519 | 0   | 0   | 6   | 12  | 100,000  | 0,00195 |
| ASCC3L1 Isoform 1 of U5 small nuclear ribonucleoprotein 200 kDa helicase                                           | IPI00420014 | 15  | 15  | 32  | 40  | 2,492    | 0,00200 |
| PGM2 Phosphoglucomutase-2                                                                                          | IPI00550364 | 0   | 0   | 5   | 5   | 100,000  | 0,00200 |
| RFC4 Replication factor C subunit 4                                                                                | IPI00017381 | 0   | 0   | 5   | 5   | 100,000  | 0,00200 |
| NUMA1 Isoform 1 of Nuclear mitotic apparatus protein 1                                                             | IPI00292771 | 2   | 1   | 14  | 10  | 8,100    | 0,00202 |
| UACA Uveal autoantigen with coiled-coil domains and ankyrin repeats                                                | IPI00173359 | 13  | 21  | 2   | 2   | -8,290   | 0,00211 |
| CYB5R1 NADH-cytochrome b5 reductase 1                                                                              | IPI00470674 | 19  | 13  | 1   | 3   | -7,644   | 0,00216 |
| VPS13A 351 kDa protein                                                                                             | IPI00251344 | 0   | 0   | 9   | 5   | 100,000  | 0,00217 |
| ARL6IP5 PRA1 family protein 3                                                                                      | IPI00007426 | 29  | 29  | 11  | 12  | -2,474   | 0,00221 |
| A2M Alpha-2-macroglobulin precursor                                                                                | IPI00478003 | 58  | 46  | 23  | 25  | -2,140   | 0,00236 |
| PDLIM1 PDZ and LIM domain protein 1                                                                                | IPI00010414 | 4   | 5   | 17  | 16  | 3,752    | 0,00238 |
| SPARC SPARC precursor                                                                                              | IPI00014572 | 9   | 8   | 1   | 0   | -15,871  | 0,00242 |
| MACF1 Isoform 2 of Microtubule-actin cross-linking factor 1, isoforms 1/2/3/5                                      | IPI00256861 | 78  | 84  | 119 | 120 | 1,480    | 0,00242 |
| NT5E 5'-nucleotidase precursor                                                                                     | IPI00009456 | 18  | 14  | 4   | 2   | -5,030   | 0,00242 |

|                                                                                                |             |     |     |     |     |          |         |
|------------------------------------------------------------------------------------------------|-------------|-----|-----|-----|-----|----------|---------|
| PDS5A SCC-112 protein                                                                          | IPI00303063 | 0   | 0   | 4   | 6   | 100,000  | 0,00243 |
| ASNS Asparagine synthetase                                                                     | IPI00554777 | 3   | 2   | 11  | 15  | 5,471    | 0,00244 |
| OAS2 Isoform p69 of 2'-5'-oligoadenylate synthetase 2                                          | IPI00218185 | 0   | 0   | 4   | 7   | 100,000  | 0,00253 |
| GALE UDP-glucose 4-epimerase                                                                   | IPI00553131 | 0   | 0   | 4   | 7   | 100,000  | 0,00253 |
| NNMT Nicotinamide N-methyltransferase                                                          | IPI00027681 | 0   | 0   | 6   | 4   | 100,000  | 0,00257 |
| MRE11A Isoform 1 of Double-strand break repair protein MRE11A                                  | IPI00029159 | 0   | 0   | 5   | 4   | 100,000  | 0,00265 |
| TMEM137;RBM14 Isoform 1 of RNA-binding protein 14                                              | IPI00013174 | 0   | 0   | 5   | 4   | 100,000  | 0,00265 |
| UBE2C Ubiquitin-conjugating enzyme E2 C                                                        | IPI00013002 | 0   | 0   | 5   | 4   | 100,000  | 0,00265 |
| ARMCX3 Armadillo repeat-containing X-linked protein 3                                          | IPI00009906 | 10  | 11  | 1   | 2   | -6,669   | 0,00268 |
| HMOX1 Heme oxygenase 1                                                                         | IPI00215893 | 8   | 11  | 1   | 1   | -9,002   | 0,00269 |
| HMGCS1 Hydroxymethylglutaryl-CoA synthase, cytoplasmic                                         | IPI00008475 | 8   | 8   | 1   | 0   | -14,936  | 0,00271 |
| MDN1 Midasin                                                                                   | IPI00167941 | 0   | 1   | 9   | 7   | 16,940   | 0,00272 |
| TMEM173 Transmembrane protein 173                                                              | IPI00257059 | 4   | 6   | 0   | 0   | -100,000 | 0,00274 |
| PC Pyruvate carboxylase, mitochondrial precursor                                               | IPI00299402 | 24  | 19  | 5   | 8   | -3,293   | 0,00275 |
| LOX Protein-lysine 6-oxidase precursor                                                         | IPI00002802 | 6   | 4   | 0   | 0   | -100,000 | 0,00275 |
| PSME2 Proteasome activator complex subunit 2                                                   | IPI00384051 | 10  | 10  | 29  | 23  | 2,694    | 0,00277 |
| RBBP7 Histone-binding protein RBBP7                                                            | IPI00395865 | 1   | 0   | 10  | 7   | 17,955   | 0,00280 |
| LONP1 Lon protease homolog, mitochondrial precursor                                            | IPI00005158 | 3   | 6   | 17  | 17  | 3,869    | 0,00284 |
| PSMB9 Isoform LMP2.L of Proteasome subunit beta type 9 precursor                               | IPI00000787 | 0   | 0   | 4   | 8   | 100,000  | 0,00284 |
| IKIP IKIP2                                                                                     | IPI00401791 | 4   | 5   | 0   | 0   | -100,000 | 0,00289 |
| ALDOC Fructose-bisphosphate aldolase C                                                         | IPI00418262 | 5   | 4   | 0   | 0   | -100,000 | 0,00290 |
| CRABP1 Cellular retinoic acid-binding protein 1                                                | IPI00219930 | 5   | 4   | 0   | 0   | -100,000 | 0,00290 |
| FLJ20254 hypothetical protein LOC54867 isoform 1                                               | IPI00783882 | 1   | 1   | 8   | 8   | 8,440    | 0,00293 |
| PRPF8 Pre-mRNA-processing-splicing factor 8                                                    | IPI00007928 | 2   | 5   | 15  | 16  | 4,520    | 0,00294 |
| XRCC5 ATP-dependent DNA helicase 2 subunit 2                                                   | IPI00220834 | 15  | 13  | 31  | 30  | 2,261    | 0,00297 |
| TUBB Tubulin beta chain                                                                        | IPI00011654 | 220 | 197 | 155 | 150 | -1,369   | 0,00299 |
| TPRKB Isoform 3 of TP53RK-binding protein                                                      | IPI00217362 | 0   | 0   | 4   | 4   | 100,000  | 0,00313 |
| NCAPD2 Condensin complex subunit 1                                                             | IPI00299524 | 0   | 0   | 4   | 4   | 100,000  | 0,00313 |
| RCC2 Protein RCC2                                                                              | IPI00465044 | 0   | 0   | 4   | 4   | 100,000  | 0,00313 |
| TRIM28 Isoform 1 of Transcription intermediary factor 1-beta                                   | IPI00438229 | 3   | 5   | 15  | 15  | 3,824    | 0,00319 |
| SMCHD1 similar to SMC hinge domain containing 1                                                | IPI00465022 | 0   | 0   | 8   | 4   | 100,000  | 0,00320 |
| DUT Isoform DUT-M of Deoxyuridine 5'-triphosphate nucleotidohydrolase, mitochondrial precursor | IPI00013679 | 4   | 5   | 18  | 14  | 3,640    | 0,00324 |
| BIRC6 528 kDa protein                                                                          | IPI00784429 | 1   | 1   | 10  | 7   | 8,992    | 0,00327 |
| FHOD1 FH1/FH2 domain-containing protein 1                                                      | IPI00001730 | 9   | 11  | 1   | 2   | -6,351   | 0,00339 |
| DYSF Dysferlin_v1                                                                              | IPI00020210 | 0   | 0   | 4   | 9   | 100,000  | 0,00341 |
| TOM1 Target of myb1                                                                            | IPI00023191 | 4   | 4   | 0   | 0   | -100,000 | 0,00350 |
| ASPH 86 kDa protein                                                                            | IPI00294834 | 11  | 9   | 2   | 1   | -6,288   | 0,00350 |
| LSM4 U6 snRNA-associated Sm-like protein LSM4                                                  | IPI00294955 | 1   | 0   | 6   | 9   | 15,751   | 0,00357 |
| ISYNA1 55 kDa protein                                                                          | IPI00478861 | 1   | 0   | 6   | 9   | 15,751   | 0,00357 |
| C4A Complement C4-A precursor                                                                  | IPI00032258 | 13  | 15  | 4   | 3   | -3,783   | 0,00376 |
| DHX15 Putative pre-mRNA-splicing factor ATP-dependent RNA helicase DHX15                       | IPI00396435 | 4   | 4   | 13  | 16  | 3,684    | 0,00391 |
| IFIT1 Interferon-induced protein with tetratricopeptide repeats 1                              | IPI00018300 | 0   | 0   | 3   | 5   | 100,000  | 0,00399 |
| DNAJB1 DnaJ homolog subfamily B member 1                                                       | IPI00015947 | 0   | 0   | 3   | 5   | 100,000  | 0,00399 |
| TAP1 transporter 1, ATP-binding cassette, sub-family B                                         | IPI00646625 | 0   | 0   | 3   | 5   | 100,000  | 0,00399 |
| GGH Gamma-glutamyl hydrolase precursor                                                         | IPI00023728 | 0   | 0   | 3   | 5   | 100,000  | 0,00399 |
| STAT2 Isoform Long of Signal transducer and activator of transcription 2                       | IPI00004312 | 0   | 1   | 7   | 6   | 13,754   | 0,00405 |
| EDIL3 Isoform 1 of EGF-like repeat and discoidin I-like domain-containing protein 3 precursor  | IPI00306046 | 0   | 1   | 7   | 6   | 13,754   | 0,00405 |
| MKI67 Isoform Long of Antigen KI-67                                                            | IPI00004233 | 1   | 0   | 7   | 6   | 13,709   | 0,00406 |
| UQCRCQ Ubiquinol-cytochrome c reductase complex ubiquinone-binding protein QP-C                | IPI00024742 | 2   | 2   | 9   | 10  | 5,007    | 0,00409 |
| PTK7 PTK7 protein tyrosine kinase 7 isoform c precursor                                        | IPI00168813 | 0   | 0   | 3   | 6   | 100,000  | 0,00413 |
| ANP32E Acidic leucine-rich nuclear phosphoprotein 32 family member E                           | IPI00165393 | 0   | 0   | 3   | 6   | 100,000  | 0,00413 |
| H1F0 Histone H1.0                                                                              | IPI00550239 | 0   | 0   | 3   | 6   | 100,000  | 0,00413 |
| SUPT16H FACT complex subunit SPT16                                                             | IPI00026970 | 0   | 0   | 5   | 3   | 100,000  | 0,00421 |
| SCD Acyl-CoA desaturase                                                                        | IPI00299468 | 0   | 0   | 5   | 3   | 100,000  | 0,00421 |
| C6orf211 UPF0364 protein C6orf211                                                              | IPI00002270 | 0   | 0   | 5   | 3   | 100,000  | 0,00421 |
| SPC24 Kinetochore protein Spc24                                                                | IPI00168317 | 0   | 0   | 5   | 3   | 100,000  | 0,00421 |
| ABCC1 Hypothetical protein DKFZp781G125                                                        | IPI00008463 | 6   | 8   | 0   | 1   | -13,474  | 0,00425 |

|                                                                                                               |             |     |     |     |     |          |         |
|---------------------------------------------------------------------------------------------------------------|-------------|-----|-----|-----|-----|----------|---------|
| MGLL monoglyceride lipase isoform 1                                                                           | IPI00293590 | 9   | 13  | 2   | 2   | -5,212   | 0,00432 |
| SLC9A3R1 Ezrin-radixin-moesin-binding phosphoprotein 50                                                       | IPI00003527 | 6   | 9   | 1   | 0   | -13,998  | 0,00433 |
| PP1F Peptidyl-prolyl cis-trans isomerase, mitochondrial precursor                                             | IPI00026519 | 0   | 0   | 3   | 4   | 100,000  | 0,00441 |
| PYGL Glycogen phosphorylase, liver form                                                                       | IPI00470525 | 0   | 0   | 3   | 4   | 100,000  | 0,00441 |
| C20orf77 Uncharacterized protein C20orf77                                                                     | IPI00009659 | 0   | 0   | 3   | 4   | 100,000  | 0,00441 |
| UBE2L6 ubiquitin-conjugating enzyme E2L 6 isoform 1                                                           | IPI00329563 | 3   | 1   | 9   | 12  | 5,522    | 0,00446 |
| DNMT1 Isoform 1 of DNA (cytosine-5)-methyltransferase 1                                                       | IPI00031519 | 0   | 0   | 4   | 3   | 100,000  | 0,00452 |
| DEK Protein DEK                                                                                               | IPI00020021 | 0   | 0   | 4   | 3   | 100,000  | 0,00452 |
| GNL1 guanine nucleotide binding protein-like 1                                                                | IPI00396387 | 0   | 0   | 4   | 3   | 100,000  | 0,00452 |
| C7orf50 MGC11257 protein                                                                                      | IPI00031651 | 0   | 0   | 4   | 3   | 100,000  | 0,00452 |
| MVK Mevalonate kinase                                                                                         | IPI00010717 | 0   | 0   | 4   | 3   | 100,000  | 0,00452 |
| MICA;HLA-A;HLA-A29.1;LOC730410;HLA-B;HLA-C HLA class I histocompatibility antigen, A-23 alpha chain precursor | IPI00472151 | 3   | 5   | 0   | 0   | -100,000 | 0,00455 |
| SLC12A2 Isoform 1 of Solute carrier family 12 member 2                                                        | IPI00022649 | 5   | 3   | 0   | 0   | -100,000 | 0,00458 |
| FARSA Phenylalanyl-tRNA synthetase alpha chain                                                                | IPI00031820 | 11  | 8   | 1   | 2   | -6,036   | 0,00463 |
| MTHFD1 C-1-tetrahydrofolate synthase, cytoplasmic                                                             | IPI00218342 | 15  | 14  | 28  | 30  | 2,072    | 0,00489 |
| RTN4 Isoform 2 of Reticulon-4                                                                                 | IPI00298289 | 46  | 42  | 26  | 16  | -2,074   | 0,00503 |
| COL18A1 Isoform 2 of Collagen alpha-1(XVIII) chain precursor                                                  | IPI00022822 | 3   | 4   | 0   | 0   | -100,000 | 0,00503 |
| CCND1 G1/S-specific cyclin-D1                                                                                 | IPI00028098 | 3   | 4   | 0   | 0   | -100,000 | 0,00503 |
| BUB3 Mitotic checkpoint protein BUB3                                                                          | IPI00013468 | 1   | 1   | 6   | 8   | 7,369    | 0,00503 |
| CDK6 Cell division protein kinase 6                                                                           | IPI00023529 | 4   | 3   | 0   | 0   | -100,000 | 0,00505 |
| SIL1 Nucleotide exchange factor SIL1 precursor                                                                | IPI00296197 | 4   | 3   | 0   | 0   | -100,000 | 0,00505 |
| RND3 Rho-related GTP-binding protein RhoE precursor                                                           | IPI00001437 | 4   | 3   | 0   | 0   | -100,000 | 0,00505 |
| ENDOD1 Endonuclease domain-containing 1 protein precursor                                                     | IPI00001952 | 10  | 8   | 2   | 1   | -5,659   | 0,00508 |
| LMNB2 Lamin-B2                                                                                                | IPI00009771 | 3   | 4   | 11  | 13  | 3,613    | 0,00508 |
| GPD2 Isoform 1 of Glycerol-3-phosphate dehydrogenase, mitochondrial precursor                                 | IPI00017895 | 7   | 5   | 20  | 15  | 2,994    | 0,00516 |
| SKIV2L superkiller viralicidic activity 2-like homolog                                                        | IPI00644297 | 12  | 8   | 0   | 2   | -9,630   | 0,00539 |
| ITIH3 Inter-alpha-trypsin inhibitor heavy chain H3 precursor                                                  | IPI00028413 | 7   | 3   | 0   | 0   | -100,000 | 0,00547 |
| PFN1 Profilin-1                                                                                               | IPI00216691 | 69  | 67  | 104 | 93  | 1,448    | 0,00556 |
| HIST1H1C Histone H1.2                                                                                         | IPI00217465 | 5   | 5   | 17  | 13  | 3,064    | 0,00560 |
| PLEC1 Isoform 1 of Plectin-1                                                                                  | IPI00014898 | 248 | 221 | 329 | 292 | 1,326    | 0,00561 |
| ISG15 Interferon-induced 17 kDa protein precursor                                                             | IPI00375631 | 5   | 3   | 15  | 12  | 3,432    | 0,00562 |
| ETF1 Eukaryotic peptide chain release factor subunit 1                                                        | IPI00429191 | 9   | 8   | 1   | 2   | -5,399   | 0,00565 |
| ENAH Isoform 2 of Protein enabled homolog                                                                     | IPI00374054 | 15  | 18  | 5   | 6   | -2,847   | 0,00569 |
| SMC3 Structural maintenance of chromosomes protein 3                                                          | IPI00219420 | 0   | 0   | 3   | 8   | 100,000  | 0,00576 |
| SMC1A Structural maintenance of chromosomes protein 1A                                                        | IPI00291939 | 0   | 0   | 3   | 8   | 100,000  | 0,00576 |
| BASP1 Brain acid soluble protein 1                                                                            | IPI00299024 | 8   | 9   | 2   | 1   | -5,343   | 0,00576 |
| CAD CAD protein                                                                                               | IPI00301263 | 17  | 13  | 28  | 32  | 2,072    | 0,00581 |
| IFIT3 Interferon-induced protein with tetratricopeptide repeats 3                                             | IPI00024254 | 0   | 0   | 3   | 3   | 100,000  | 0,00583 |
| FAM129A Niban protein                                                                                         | IPI00328350 | 0   | 0   | 3   | 3   | 100,000  | 0,00583 |
| UBE2E1;UBE2E2 Ubiquitin-conjugating enzyme E2 E1                                                              | IPI00021346 | 0   | 0   | 3   | 3   | 100,000  | 0,00583 |
| FAM128B hypothetical protein LOC80097                                                                         | IPI00410094 | 0   | 0   | 3   | 3   | 100,000  | 0,00583 |
| ATP2B4 Isoform XD of Plasma membrane calcium-transporting ATPase 4                                            | IPI00012490 | 19  | 17  | 7   | 6   | -2,622   | 0,00587 |
| RRBP1 Ribosome-binding protein 1                                                                              | IPI00215743 | 60  | 55  | 35  | 36  | -1,599   | 0,00593 |
| PCNA Proliferating cell nuclear antigen                                                                       | IPI00021700 | 4   | 3   | 11  | 12  | 3,463    | 0,00593 |
| DIAPH1 Diaphanous 1                                                                                           | IPI00030876 | 4   | 4   | 11  | 14  | 3,291    | 0,00603 |
| MVP Major vault protein                                                                                       | IPI00000105 | 60  | 59  | 41  | 32  | -1,626   | 0,00607 |
| KIAA1967 Isoform 2 of Protein KIAA1967                                                                        | IPI00182757 | 0   | 1   | 9   | 5   | 14,859   | 0,00620 |
| PTRF Isoform 1 of Polymerase I and transcript release factor                                                  | IPI00176903 | 26  | 35  | 15  | 14  | -2,132   | 0,00629 |
| PSMB8 Isoform 1 of Proteasome subunit beta type 8 precursor                                                   | IPI00000783 | 5   | 4   | 14  | 13  | 3,047    | 0,00631 |
| NCLN Isoform 1 of Nicalin precursor                                                                           | IPI00470649 | 8   | 5   | 0   | 1   | -12,519  | 0,00638 |
| GSN Isoform 1 of Gelsolin precursor                                                                           | IPI00026314 | 33  | 32  | 18  | 17  | -1,868   | 0,00658 |
| S100A10 Protein S100-A10                                                                                      | IPI00183695 | 12  | 11  | 2   | 4   | -3,652   | 0,00670 |
| CTGF Isoform 1 of Connective tissue growth factor precursor                                                   | IPI00020977 | 13  | 10  | 3   | 3   | -3,634   | 0,00672 |
| COMMD7 COMMD7 protein                                                                                         | IPI00641139 | 3   | 3   | 0   | 0   | -100,000 | 0,00673 |
| HCCS Cytochrome c-type heme lyase                                                                             | IPI00023406 | 3   | 3   | 0   | 0   | -100,000 | 0,00673 |
| KIAA1199 Isoform 1 of Protein KIAA1199 precursor                                                              | IPI00376689 | 3   | 3   | 0   | 0   | -100,000 | 0,00673 |
| DNAJC5 Isoform 2 of DnaJ homolog subfamily C member 5                                                         | IPI00023780 | 3   | 3   | 0   | 0   | -100,000 | 0,00673 |

|                                                                                                      |             |    |    |    |    |          |         |
|------------------------------------------------------------------------------------------------------|-------------|----|----|----|----|----------|---------|
| EHD3 EH domain-containing protein 3                                                                  | IPI00021458 | 3  | 3  | 0  | 0  | -100,000 | 0,00673 |
| ETFDH Isoform 1 of Electron transfer flavoprotein-ubiquinone oxidoreductase, mitochondrial precursor | IPI00032875 | 3  | 3  | 0  | 0  | -100,000 | 0,00673 |
| UCHL1 Ubiquitin carboxyl-terminal hydrolase isozyme L1                                               | IPI00018352 | 20 | 21 | 40 | 35 | 1,792    | 0,00678 |
| IPO9 Importin-9                                                                                      | IPI00185146 | 1  | 2  | 7  | 8  | 5,273    | 0,00678 |
| CCDC47 Isoform 1 of Coiled-coil domain-containing protein 47 precursor                               | IPI00024642 | 8  | 8  | 1  | 2  | -5,081   | 0,00691 |
| ALB Serum albumin                                                                                    | IPI00022434 | 11 | 11 | 3  | 3  | -3,475   | 0,00701 |
| FAM38A Mib                                                                                           | IPI00006093 | 8  | 8  | 2  | 1  | -5,029   | 0,00705 |
| SRP68 Isoform 1 of Signal recognition particle 68 kDa protein                                        | IPI00168388 | 1  | 5  | 13 | 13 | 4,398    | 0,00705 |
| PPIA;PPIAL3;LOC654188 Peptidyl-prolyl cis-trans isomerase A                                          | IPI00419585 | 50 | 59 | 86 | 78 | 1,499    | 0,00706 |
| PRDX1 Peroxiredoxin-1                                                                                | IPI00000874 | 51 | 68 | 34 | 31 | -1,806   | 0,00730 |
| RAD50 Isoform 1 of DNA repair protein RAD50                                                          | IPI00305282 | 1  | 1  | 5  | 9  | 7,353    | 0,00735 |
| NRD1 Nardilysin                                                                                      | IPI00243221 | 13 | 6  | 1  | 0  | -17,747  | 0,00753 |
| CHD4 Isoform 1 of Chromodomain-helicase-DNA-binding protein 4                                        | IPI00000846 | 0  | 1  | 5  | 5  | 10,567   | 0,00770 |
| IGF2BP3 Isoform 1 of Insulin-like growth factor 2 mRNA-binding protein 3                             | IPI00658000 | 2  | 1  | 6  | 10 | 5,602    | 0,00795 |
| MSH2 DNA mismatch repair protein Msh2                                                                | IPI00017303 | 0  | 0  | 2  | 4  | 100,000  | 0,00800 |
| IGF2BP1 Insulin-like growth factor 2 mRNA-binding protein 1                                          | IPI00008557 | 0  | 0  | 2  | 4  | 100,000  | 0,00800 |
| RFC2 Isoform 1 of Replication factor C subunit 2                                                     | IPI00017412 | 0  | 0  | 2  | 4  | 100,000  | 0,00800 |
| PYGB Glycogen phosphorylase, brain form                                                              | IPI00004358 | 41 | 52 | 26 | 27 | -1,732   | 0,00806 |
| RFC5 Replication factor C subunit 5                                                                  | IPI00031514 | 0  | 0  | 2  | 5  | 100,000  | 0,00806 |
| HM13 Isoform 1 of Minor histocompatibility antigen H13                                               | IPI00152441 | 16 | 13 | 6  | 3  | -3,039   | 0,00837 |
| PLSCR1 Phospholipid scramblase 1                                                                     | IPI00005181 | 0  | 0  | 4  | 2  | 100,000  | 0,00837 |
| C10orf35 Uncharacterized protein C10orf35                                                            | IPI00060546 | 0  | 0  | 4  | 2  | 100,000  | 0,00837 |
| C14orf173 hypothetical protein LOC64423 isoform 1                                                    | IPI00008339 | 23 | 26 | 11 | 13 | -2,017   | 0,00851 |
| DSP Isoform DPI of Desmoplakin                                                                       | IPI00013933 | 63 | 62 | 10 | 31 | -3,006   | 0,00859 |
| IFI35 Isoform 1 of Interferon-induced 35 kDa protein                                                 | IPI00008613 | 0  | 1  | 4  | 7  | 11,575   | 0,00861 |
| DKFZP564J0863 Isoform 1 of Atlantin-3                                                                | IPI00550523 | 18 | 17 | 7  | 7  | -2,370   | 0,00862 |
| SDC1 Syndecan-1 precursor                                                                            | IPI00002441 | 0  | 0  | 5  | 2  | 100,000  | 0,00872 |
| CSRP2 Cysteine and glycine-rich protein 2                                                            | IPI00002824 | 2  | 2  | 9  | 7  | 4,228    | 0,00909 |
| KHSRP KH-type splicing regulatory protein                                                            | IPI00479786 | 5  | 4  | 15 | 11 | 2,936    | 0,00912 |
| SEC24B Protein transport protein Sec24B                                                              | IPI00030851 | 2  | 4  | 0  | 0  | -100,000 | 0,00926 |
| MSH6 Isoform GTBP-N of DNA mismatch repair protein MSH6                                              | IPI00384456 | 0  | 0  | 2  | 6  | 100,000  | 0,00930 |
| TK1 Thymidine kinase, cytosolic                                                                      | IPI00299214 | 0  | 0  | 2  | 6  | 100,000  | 0,00930 |
| FAH Fumarylacetoacetase                                                                              | IPI00031708 | 4  | 2  | 0  | 0  | -100,000 | 0,00930 |
| CLU clusterin isoform 1                                                                              | IPI00400826 | 5  | 2  | 0  | 0  | -100,000 | 0,00936 |
| RABGGTA Geranylgeranyl transferase type-2 alpha subunit                                              | IPI00022664 | 5  | 2  | 0  | 0  | -100,000 | 0,00936 |
| SNRPE Small nuclear ribonucleoprotein E                                                              | IPI00029266 | 3  | 5  | 13 | 11 | 3,036    | 0,00936 |
| UGDH UDP-glucose 6-dehydrogenase                                                                     | IPI00031420 | 36 | 35 | 23 | 17 | -1,771   | 0,00941 |
| FDFT1 Squalene synthetase                                                                            | IPI00020944 | 5  | 5  | 1  | 0  | -9,335   | 0,00945 |
| VIL2 Ezrin                                                                                           | IPI00843975 | 10 | 12 | 25 | 20 | 2,113    | 0,00946 |
| GBP1 Interferon-induced guanylate-binding protein 1                                                  | IPI00028564 | 1  | 2  | 6  | 8  | 4,915    | 0,00952 |
| SEC31A Isoform 3 of Protein transport protein Sec31A                                                 | IPI00305152 | 24 | 24 | 14 | 11 | -1,972   | 0,00964 |
| DDX58 Isoform 1 of Probable ATP-dependent RNA helicase DDX58                                         | IPI00654731 | 0  | 0  | 2  | 3  | 100,000  | 0,00974 |
| CBFB core-binding factor, beta subunit isoform 1                                                     | IPI00024871 | 0  | 0  | 2  | 3  | 100,000  | 0,00974 |
| C16orf61 UPF0287 protein C16orf61                                                                    | IPI00024619 | 0  | 0  | 2  | 3  | 100,000  | 0,00974 |
| ATG3 Isoform 1 of Autophagy-related protein 3                                                        | IPI00022254 | 0  | 0  | 2  | 3  | 100,000  | 0,00974 |
| NEK9 Serine/threonine-protein kinase Nek9                                                            | IPI00301609 | 0  | 0  | 2  | 3  | 100,000  | 0,00974 |
| SFRS10 Isoform 1 of Splicing factor, arginine/serine-rich 10                                         | IPI00301503 | 0  | 0  | 2  | 3  | 100,000  | 0,00974 |
| SDHC Succinate dehydrogenase cytochrome b560 subunit, mitochondrial precursor                        | IPI00016968 | 0  | 0  | 2  | 3  | 100,000  | 0,00974 |
| GNPDA2 Glucosamine-6-phosphate isomerase SB52                                                        | IPI00550894 | 0  | 0  | 2  | 3  | 100,000  | 0,00974 |
| TPD52 Tumor protein D52                                                                              | IPI00218323 | 0  | 0  | 2  | 3  | 100,000  | 0,00974 |
| GDA Guanine deaminase                                                                                | IPI00465184 | 0  | 0  | 2  | 3  | 100,000  | 0,00974 |
| LRBA Lipopolysaccharide-responsive and beige-like anchor protein                                     | IPI00002255 | 1  | 2  | 8  | 6  | 4,937    | 0,00990 |
| DDX42 Isoform 1 of ATP-dependent RNA helicase DDX42                                                  | IPI00409671 | 0  | 0  | 3  | 2  | 100,000  | 0,00991 |
| FLJ14668 Hypothetical protein FLJ14668                                                               | IPI00303722 | 0  | 0  | 3  | 2  | 100,000  | 0,00991 |
| HSPA4L Heat shock 70 kDa protein 4L                                                                  | IPI00295485 | 0  | 0  | 3  | 2  | 100,000  | 0,00991 |
| IFIT2 Interferon-induced protein with tetratricopeptide repeats 2                                    | IPI00018298 | 0  | 0  | 3  | 2  | 100,000  | 0,00991 |
| POLR2J RPB11a protein                                                                                | IPI00003310 | 0  | 0  | 3  | 2  | 100,000  | 0,00991 |

|                                                                           |             |   |   |   |   |         |         |
|---------------------------------------------------------------------------|-------------|---|---|---|---|---------|---------|
| CTPS2 CTP synthase 2                                                      | IPI00645702 | 0 | 0 | 3 | 2 | 100,000 | 0,00991 |
| LEPREL1 Prolyl 3-hydroxylase 2 precursor                                  | IPI00217055 | 0 | 0 | 3 | 2 | 100,000 | 0,00991 |
| EXOSC1 3'-5' exoribonuclease CSL4 homolog                                 | IPI00032823 | 0 | 0 | 3 | 2 | 100,000 | 0,00991 |
| TMPO Isoform Beta of Lamina-associated polypeptide 2, isoforms beta/gamma | IPI00030131 | 0 | 0 | 3 | 2 | 100,000 | 0,00991 |
